# Supplementary material for: Characterizing Early Cardiac Metabolic Programming via 30% Maternal Nutrient Reduction during Fetal Development in a Non-Human Primate Model
Source: MDPI journal article supplement (doi:10.3390/ijms242015192), 2023-10-14
Supplement: s1 [file s1]

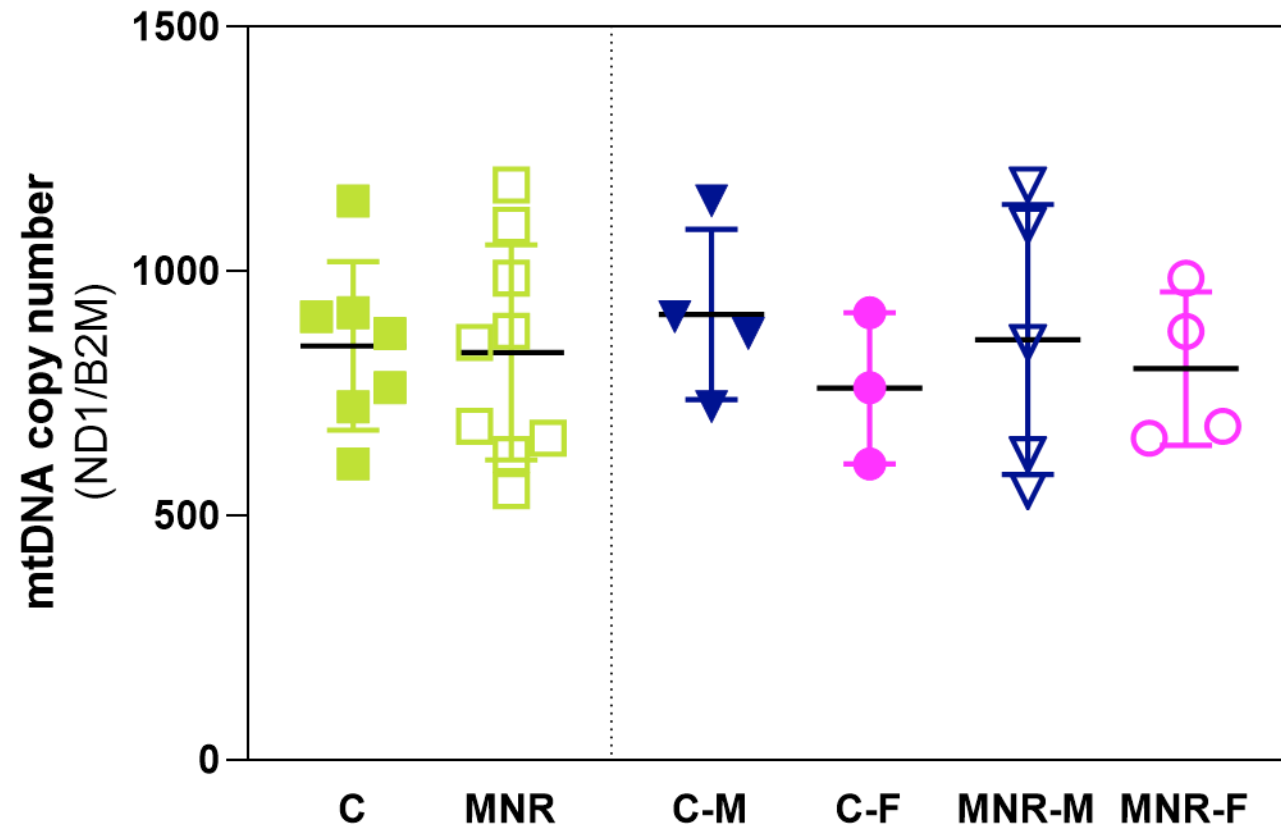

**Figure S1.** Cardiac relative mtDNA copy numbers of mitochondrial genes.

Control (C): fetuses born from mothers fed a control diet; MNR: fetuses born from mothers fed a 30% nutrient-restricted diet; C-M/C-F: male/female fetuses born from mothers fed a control diet (filled symbols); MNR-M/MNR-F: fetuses born from mothers fed a 30% nutrient-restricted diet (open symbols).
